# Supplementary material
Source: PubMed Central journal article supplement (PMC1838497)

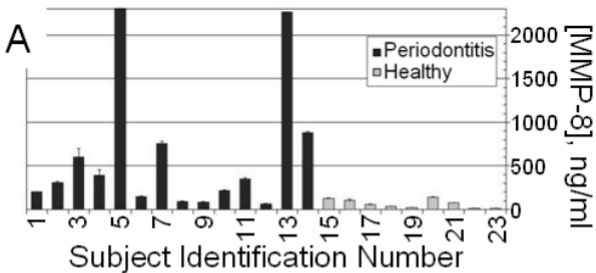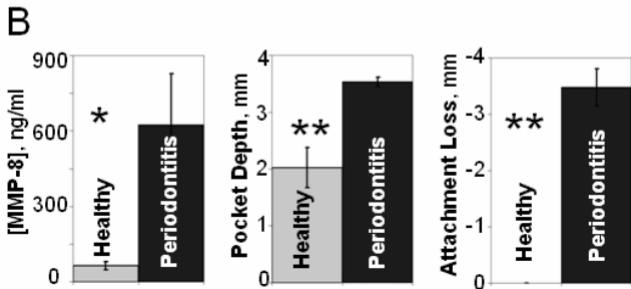

Supplement: pnas_0607254104_1.pdf [file pnas_0607254104_1.pdf]
